# Supplementary material for: Designing innovative heterostructures composed of TiO2/Bi2Te3/carbon cloth for highly efficient sodium-ion batteries
Source: Royal Society of Chemistry journal article supplement (doi:10.1039/d4ce00712c), 2024-01-01
Supplement: d4ce00712c1.pdf [file d4ce00712c1.pdf]

## Supplementary Material

### Designing innovative heterostructures composed of $\text{TiO}_2/\text{Bi}_2\text{Te}_3/$ **carbon cloth** for high efficient sodium-ion batteries

Manshu Han\*, Yirong Zhao, Yongfeng Bai, Yu Li, Minghua Chen\*, Qingguo Chen\*

Key Laboratory of Engineering Dielectric and Applications (Ministry of Education),  
School of Electrical and Electronic Engineering, Harbin University of Science and  
Technology, Harbin 150080, P. R. China

---

\* Corresponding author.

Email: [hanmanshu@hrbust.edu.cn](mailto:hanmanshu@hrbust.edu.cn); [qgchen@263.net](mailto:qgchen@263.net); [mhchen@hrbust.edu.cn](mailto:mhchen@hrbust.edu.cn)

## Material characterization

The crystal structure of Bi<sub>2</sub>Te<sub>3</sub> and TiO<sub>2</sub>/Bi<sub>2</sub>Te<sub>3</sub>/CC heterostructures were measured by X-ray diffraction (XRD, Bruker-AXS/D8 Advance powder diffractometer equipped with Cu K $\alpha$  radiation ( $\lambda = 1.541 \text{ \AA}$ )) and a Witec Alpha 300 R confocal Raman microscopy. The morphology was examined analyzed by field-emission scanning electron microscopy (FESEM, Hitachi/SU8020) with Energy Dispersive X-Ray Fluorescence Spectrometer (EDAX). The atomic resolution images and element allocation distribution were characterized by high-resolution transmission electron microscopy (HRTEM, FEI Tecnai G<sup>2</sup> F20) with Energy Dispersive Spectrometer (EDS). X-ray photoemission spectroscopy (XPS) measurements were performed by Thermo Scientific ESCALAB 250Xi with Al K $\alpha$  source ( $h\nu = 1486.6 \text{ eV}$ ).

## Electrochemical measurements

A CR2032-type coin cell with TiO<sub>2</sub>/Bi<sub>2</sub>Te<sub>3</sub>/CC as active material was assembled for cell testing. The active material (TiO<sub>2</sub>/Bi<sub>2</sub>Te<sub>3</sub>/CC) was used directly as the positive electrode of the half-cell. The loading of each electrode sheet was approximately 0.3 mg/cm<sup>2</sup>. The cell was encapsulated in a closed glove box containing argon gas with sodium sheets as counter electrodes and glass fibers and 1.0 M NaClO<sub>4</sub> (EC: DMC = 1:1 vol% with 5% FEC) as separator and electrolyte, respectively.

Electrochemical impedance spectroscopy (EIS) measurements were performed on an electrochemical workstation (CHI 660E) using a frequency range of 100 kHz to 10 mHz, and cyclic voltammetry (CV) tests were performed on an electrochemical

workstation using different scan rates from 0.2-2 mV s<sup>-1</sup> with a voltage range of 0.3-2.8

V.
